# Supplementary material for: Precisely controlled heterogeneous nucleation sites for TiO2crystal growth
Source: Royal Society of Chemistry journal article supplement (doi:10.1039/c4ce00537f), 2014-05-16
Supplement: c4ce00537f1.pdf [file c4ce00537f1.pdf]

## Supporting Information

### Controlled Heterogenous Nucleation Process for TiO<sub>2</sub> Crystal Growth

*Shuang Yang, Yu Hou, Bo Zhang, Xiao Hua Yang, Hui Jun Zhao and Hua Gui Yang\**

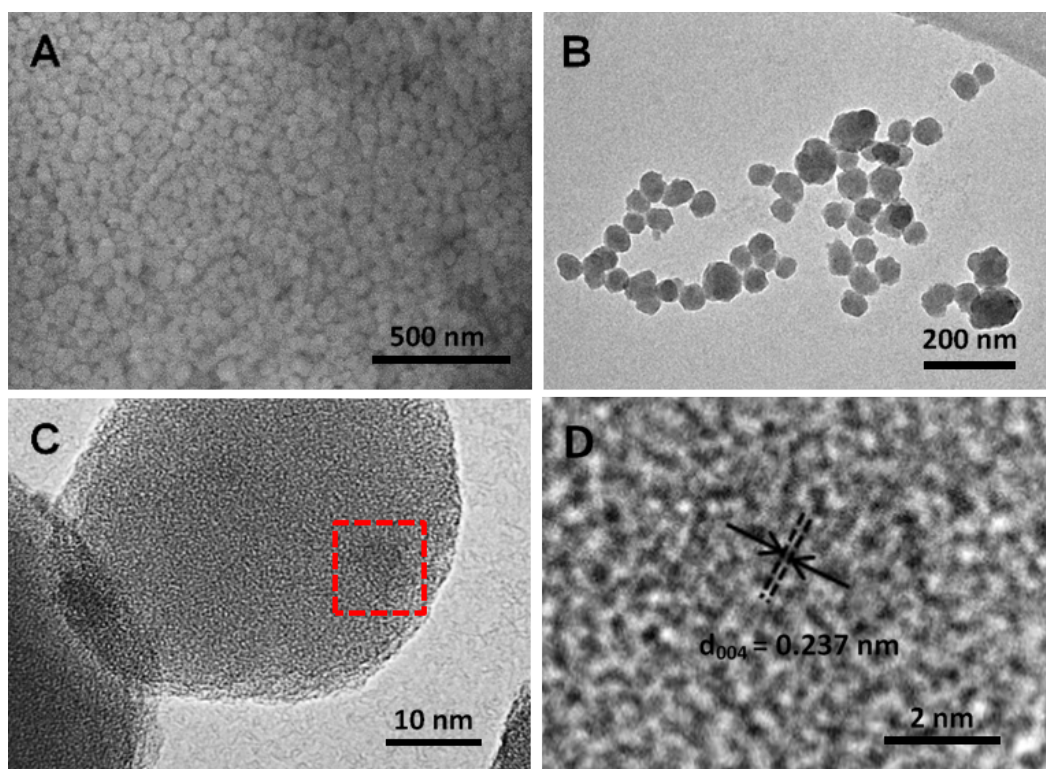

**Figure S1.** (A, B) SEM and TEM characterization of sintered silica spheres. (C) Typical TEM image of silica spheres with TiO<sub>2</sub> seeds. (D) HR-TEM image of TiO<sub>2</sub> seeds in the selected area.

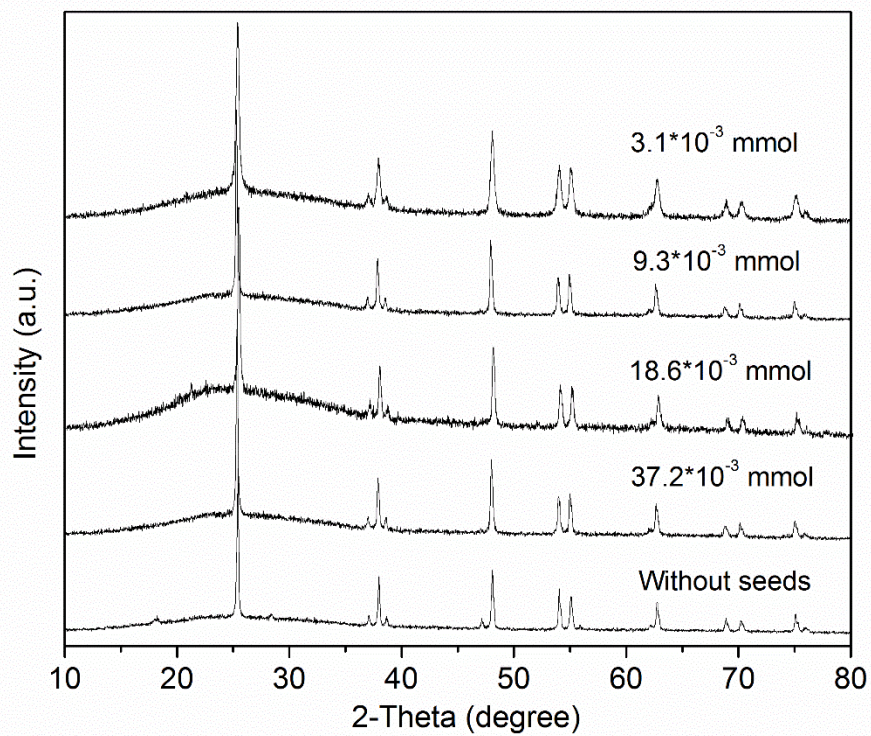

**Figure S2.** XRD pattern of the as-prepared anatase TiO<sub>2</sub> nanosheets with different titanium seed contents.

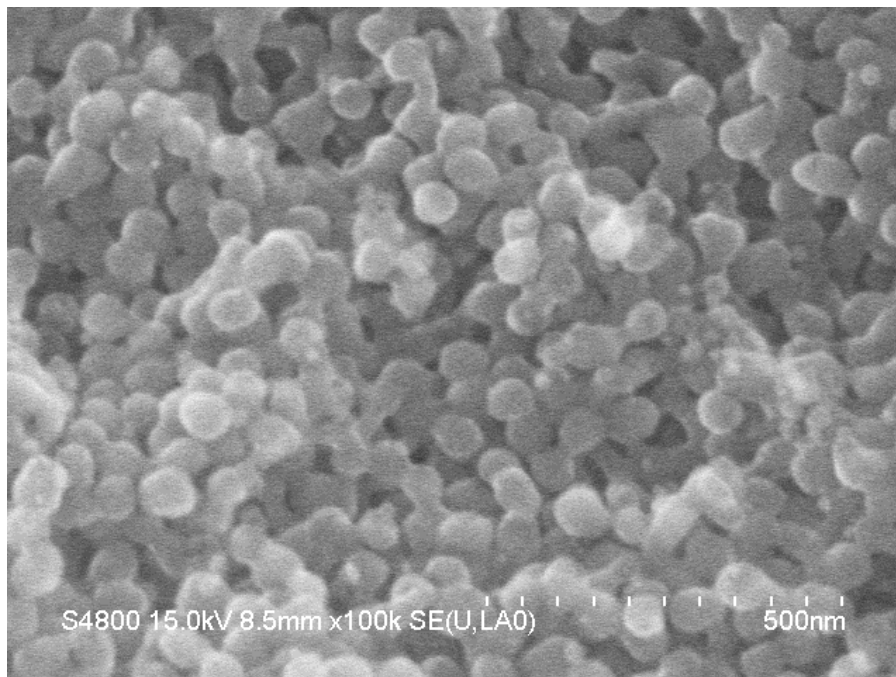

**Figure S3.** SEM image of silica spheres after hydrothermal reaction without ultrasonic treatment (reaction conditions  $\text{SiO}_2$  spheres 600 mg, 20mM  $\text{TiF}_4$  0.1 mL 47%HF).

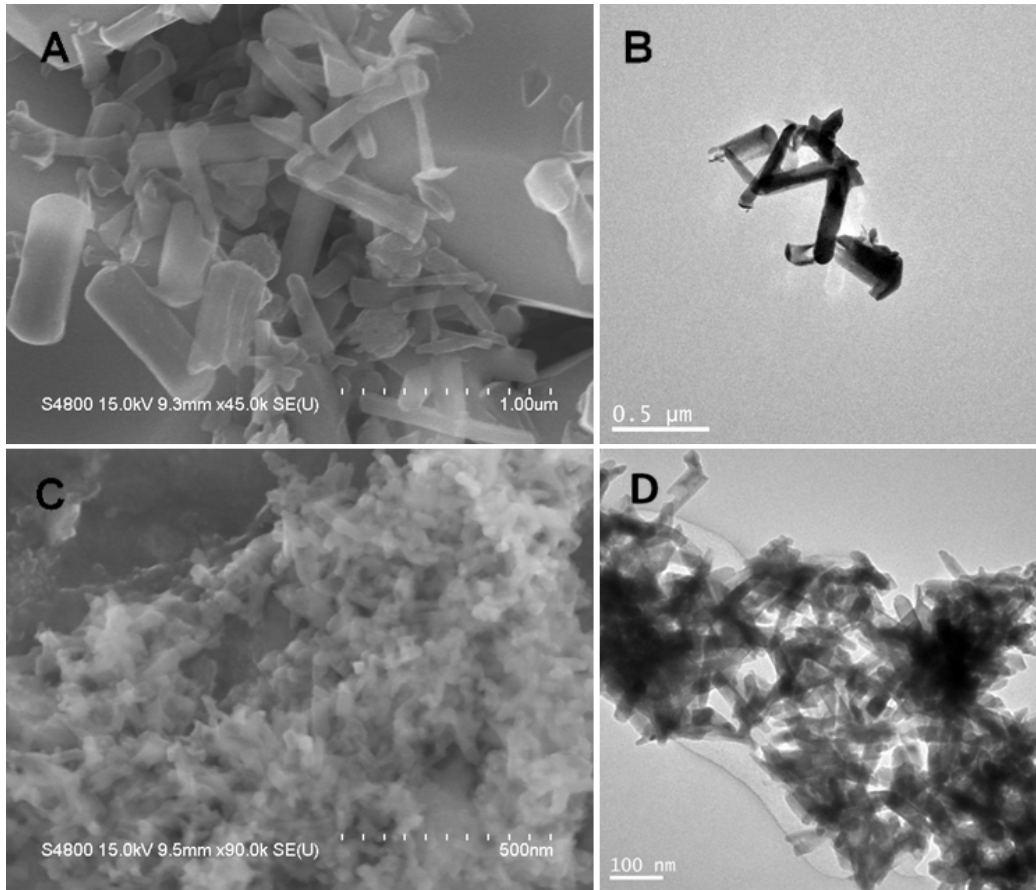

**Figure 4.** SEM and TEM characterization of Fe<sub>2</sub>O<sub>3</sub> crystals synthesized without (A, B) and with seeds (C, D).
